# Supplementary material
Source: Springer Nature journal article supplement (https://www.springermedizin.de/resource/supplementary/13023_2013_735_MOESM6_ESM.pdf/9642928)
Supplement: MOESM6 [file 9642928]

| <b>GROUPS OF DISEASES (ICD9-CM)</b>                          | Prevalence<br>per 10,000 | Incidence<br>per 10,000 | Mortality<br>per 100,000 | Fatality<br>per 1,000 |
|--------------------------------------------------------------|--------------------------|-------------------------|--------------------------|-----------------------|
| Infectious and parasitic diseases                            | 0.05                     | 0.002                   | -                        | -                     |
| Neoplasms                                                    | 1.37                     | 0.103                   | 0.24                     | 3.90                  |
| Endocrine disorders                                          | 1.05                     | 0.132                   | 0.13                     | 2.25                  |
| Disorders of amino-acid transport and metabolism             | 0.61                     | 0.041                   | 0.27                     | 8.64                  |
| Disorders of carbohydrate transport and metabolism           | 0.22                     | 0.027                   | 0.03                     | 2.14                  |
| Disorders of lipoid metabolism                               | 0.22                     | 0.025                   | 0.13                     | 10.13                 |
| Disorders of mineral metabolism                              | 1.65                     | 0.213                   | 0.21                     | 2.51                  |
| Disorders of plasma protein metabolism                       | 0.06                     | 0.002                   | 0.16                     | 38.99                 |
| Metabolic disorders (others)                                 | 0.19                     | 0.021                   | 0.21                     | 19.52                 |
| Immunity disorders                                           | 1.23                     | 0.118                   | 0.24                     | 3.30                  |
| Diseases of the blood and blood-forming organs               | 4.83                     | 0.445                   | 1.18                     | 4.21                  |
| Central nervous system disorders                             | 1.79                     | 0.176                   | 5.64                     | 71.36                 |
| Peripheral nervous system disorders                          | 1.72                     | 0.223                   | 0.77                     | 8.68                  |
| Disorders of the eye and adnexa                              | 4.47                     | 0.759                   | 0.45                     | 2.12                  |
| Diseases of the circulatory system                           | 1.12                     | 0.103                   | 0.59                     | 14.06                 |
| Diseases of the digestive system                             | 0.63                     | 0.070                   | 0.21                     | 6.03                  |
| Diseases of the genitourinary system                         | 0.19                     | 0.037                   | 0.05                     | 8.40                  |
| Diseases of the skin and subcutaneous tissue                 | 1.20                     | 0.215                   | 0.85                     | 19.11                 |
| Diseases of the musculoskeletal system and connective tissue | 2.76                     | 0.250                   | 0.61                     | 3.98                  |
| Congenital anomalies                                         | 5.45                     | 0.621                   | 0.96                     | 3.21                  |
| Certain conditions originating in the perinatal period       | 0.03                     | 0.002                   | 0.05                     | 19.36                 |
